# Supplementary material for: Fe3O4 supported [Cu(ii)(met)(pro-H)2] complex as a novel nanomagnetic catalytic system for room temperature C–O coupling reactions
Source: Royal Society of Chemistry journal article supplement (doi:10.1039/d3ra03509c), 2023-01-01
Supplement: d3ra03509c1.pdf [file d3ra03509c1.pdf]

## Supporting Information

### **Fe<sub>3</sub>O<sub>4</sub> supported [Cu(II) (met)(pro-H)<sub>2</sub>] complex as a novel nanomagnetic catalytic System for room temperature C-O coupling reactions**

Ahmed Talal Ali <sup>a,\*</sup>, Muthik A.Guda <sup>b</sup>, Amjad I. Oraibi <sup>c</sup>, Issam K. Salih <sup>d</sup>, A.H. Shather <sup>e</sup>, Abbas Talib Abd Ali <sup>f</sup>, Ahmed L. Azzawi <sup>g</sup>, Haider Abdulkareem Almashhadani <sup>h</sup>

<sup>a</sup> Department of Pharmaceutical chemistry, College of Pharmacy, University of Basrah.

<sup>b</sup> Kufa University, College of Science, Department of Ecology Science.

<sup>c</sup> Al-Manara College for Medical Sciences, department of pharmacy.

<sup>d</sup> Department of Chemical Engineering and Petroleum Industries, Al-Mustaqbal University College 51001 Hilla, Babylon, Iraq.

<sup>e</sup> Department of computer engineering technology Al Kitab University, Altun Kopru, Kirkuk 00964, Iraq.

<sup>f</sup> Department of Medical Laboratories Technology, National University of Science and Technology, Dhi Qar, Iraq.

<sup>g</sup> Uruk University, College of Dentistry, Baghdad, Iraq.

<sup>h</sup> University of Baghdad, College of Science, Chemistry Department, Baghdad, Iraq.

**Corresponding author \*Email: [haider.200690@gmail.com](mailto:haider.200690@gmail.com)**

**Copies of NMR spectra:**

# Supporting Information

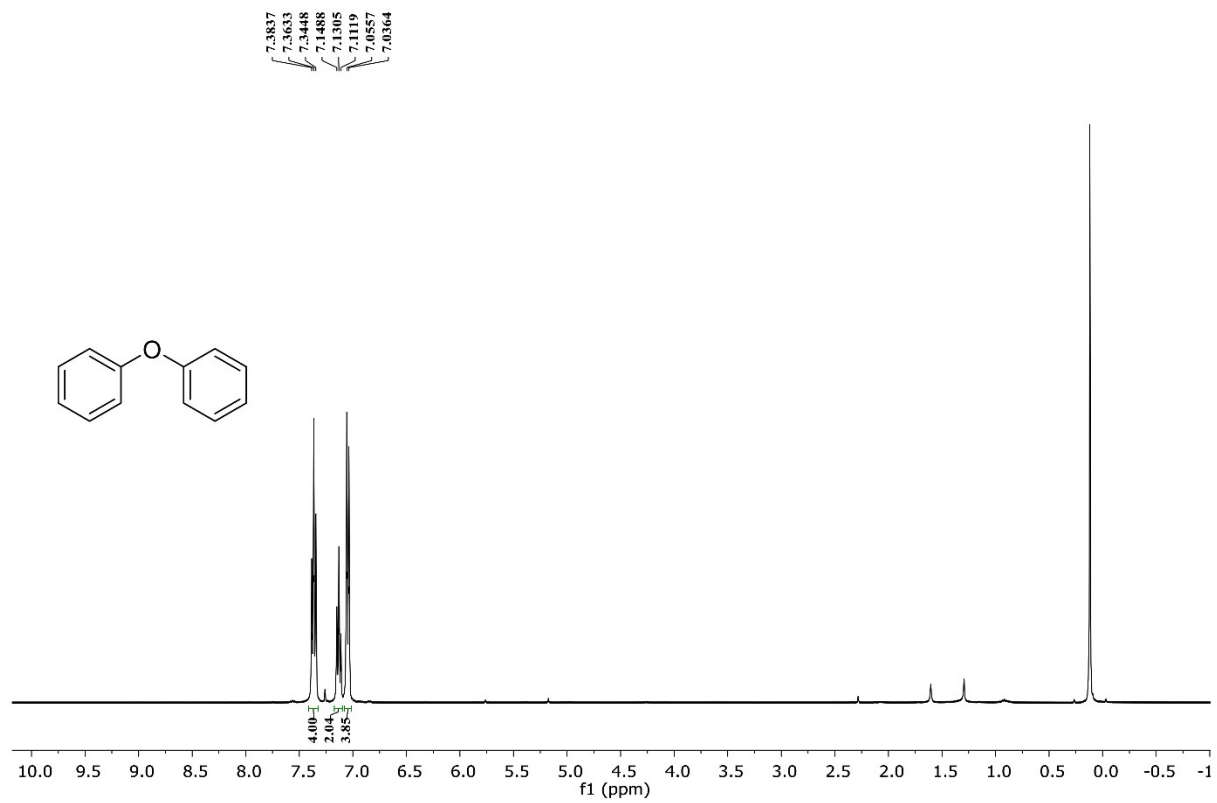

**Figure S1.** <sup>1</sup>H NMR spectrum of Diphenyl ether.

## Supporting Information

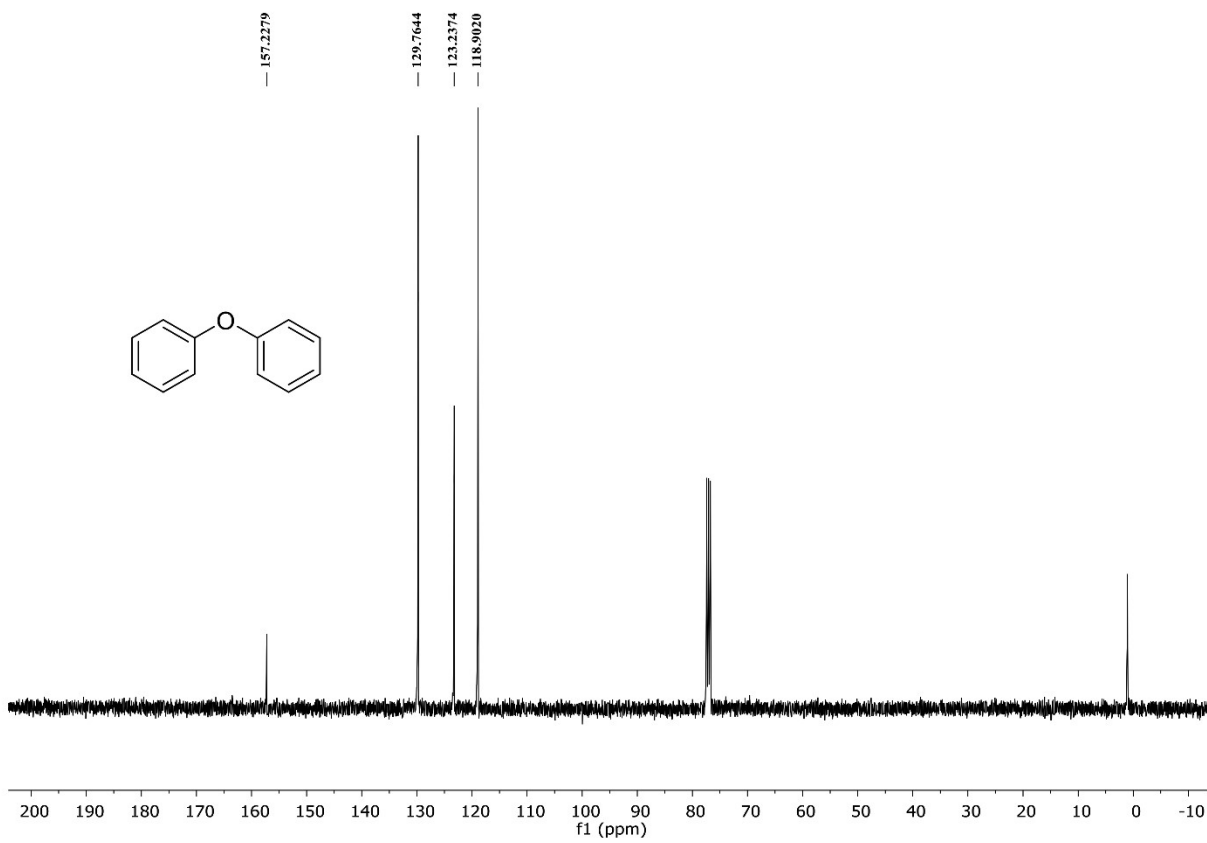

**Figure S2.**  $^{13}\text{C}$ NMR spectrum of Diphenyl ether.

## Supporting Information

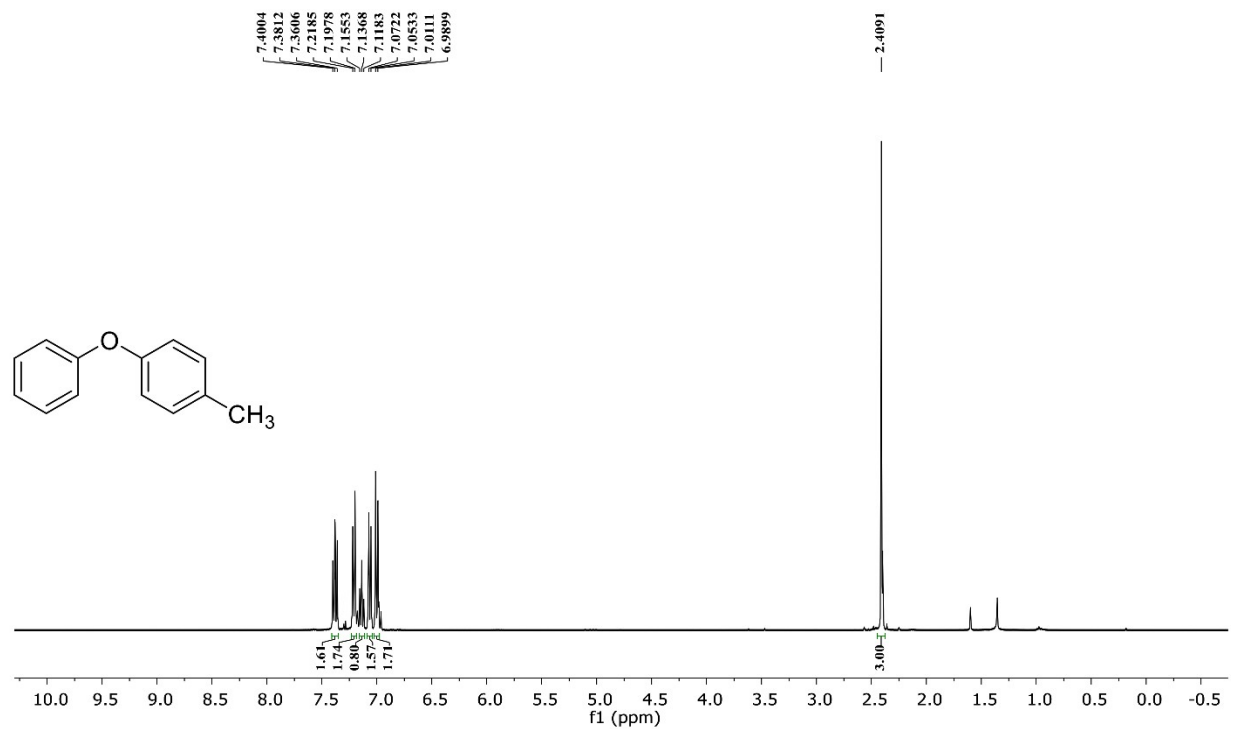

Figure S3. <sup>1</sup>H NMR spectrum of 1-Methyl-4-phenoxybenzene.

## Supporting Information

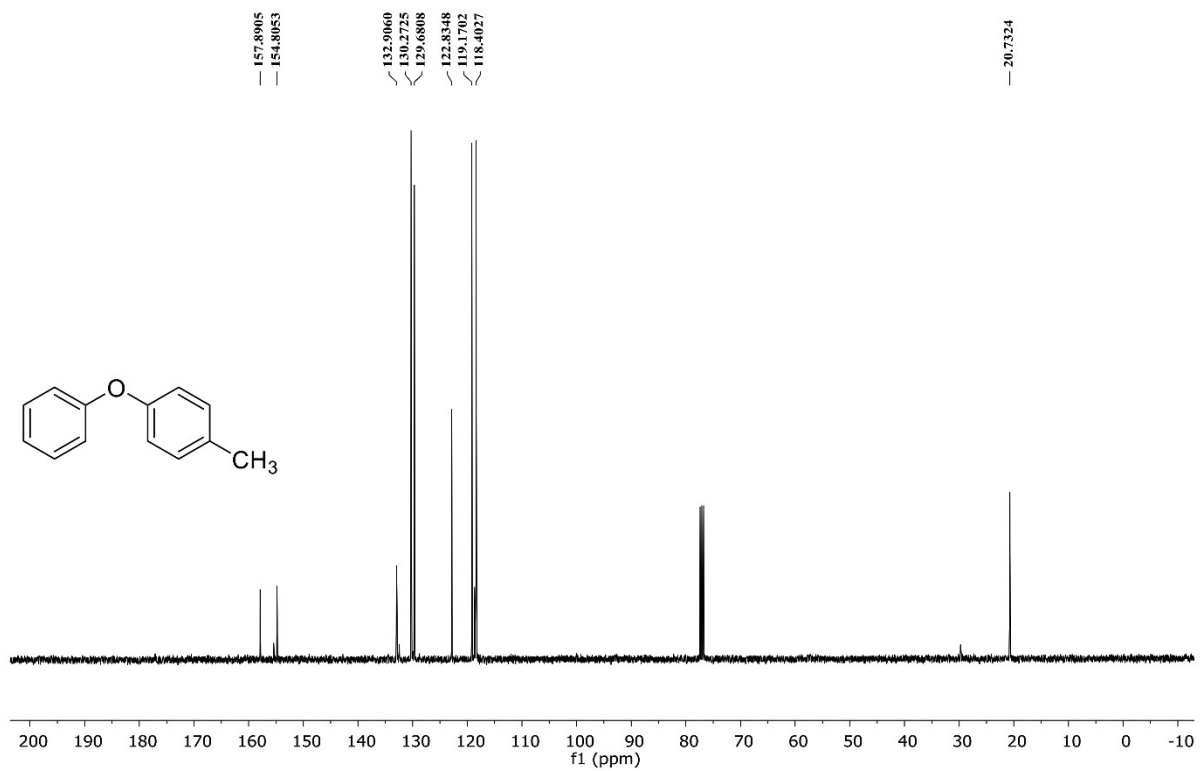

Figure S4.  $^{13}\text{C}$ NMR spectrum of 1-Methyl-4-phenoxybenzene.

## Supporting Information

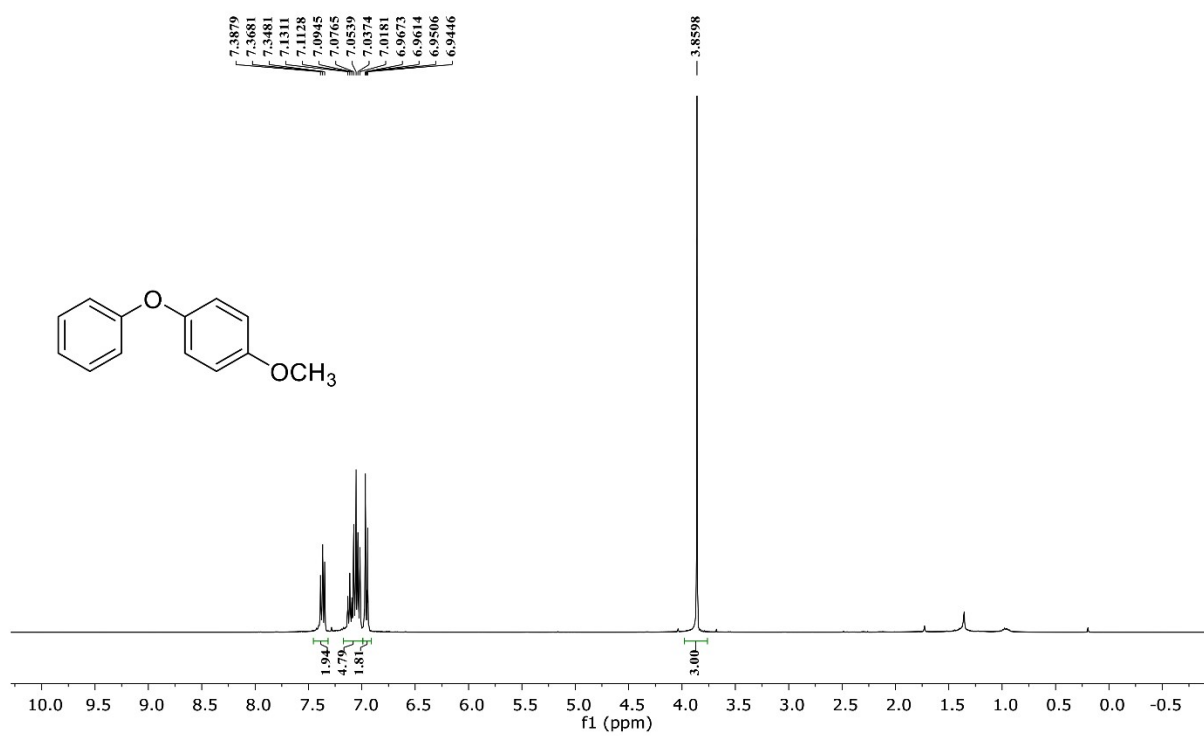

**Figure S5.** <sup>1</sup>H NMR spectrum of 1-Methoxy-4-phenoxybenzene.

# Supporting Information

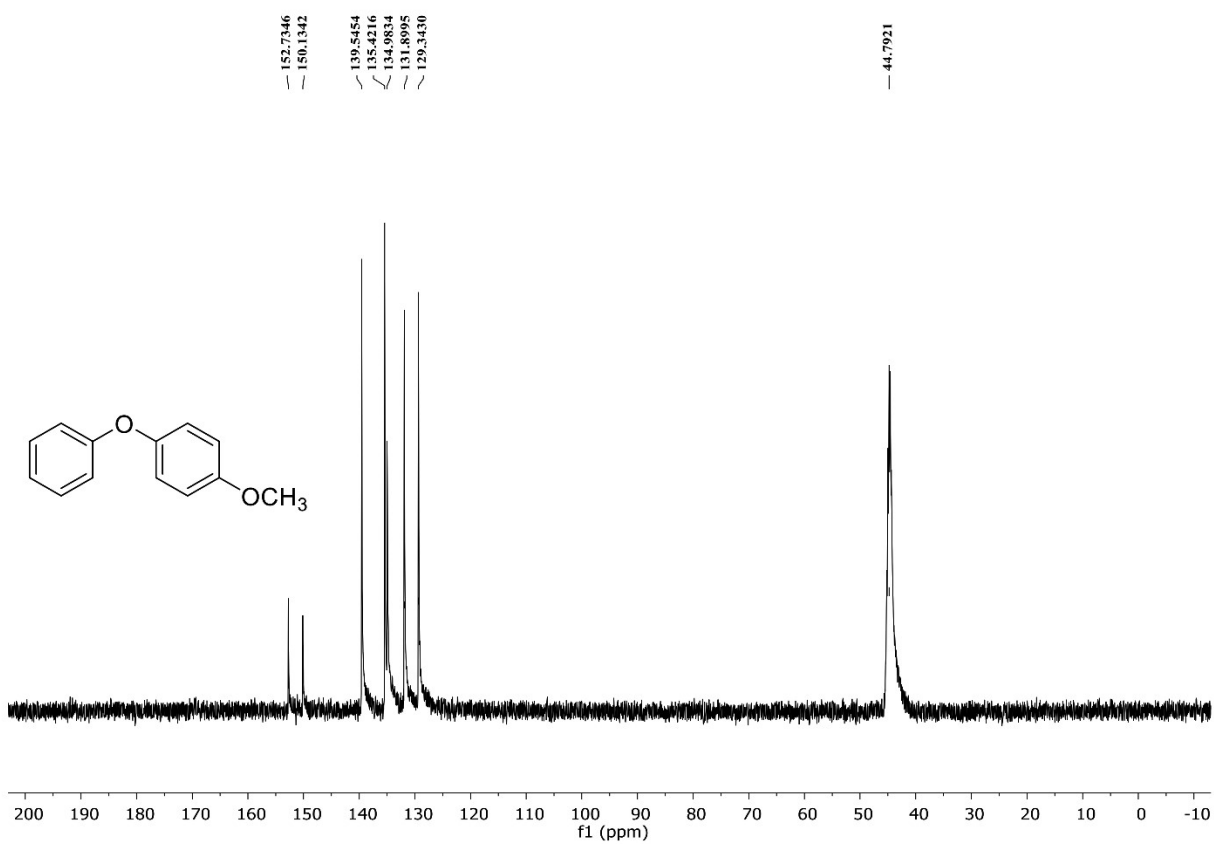

**Figure S6.** <sup>13</sup>CNMR spectrum of 1-Methoxy-4-phenoxybenzene.

## Supporting Information

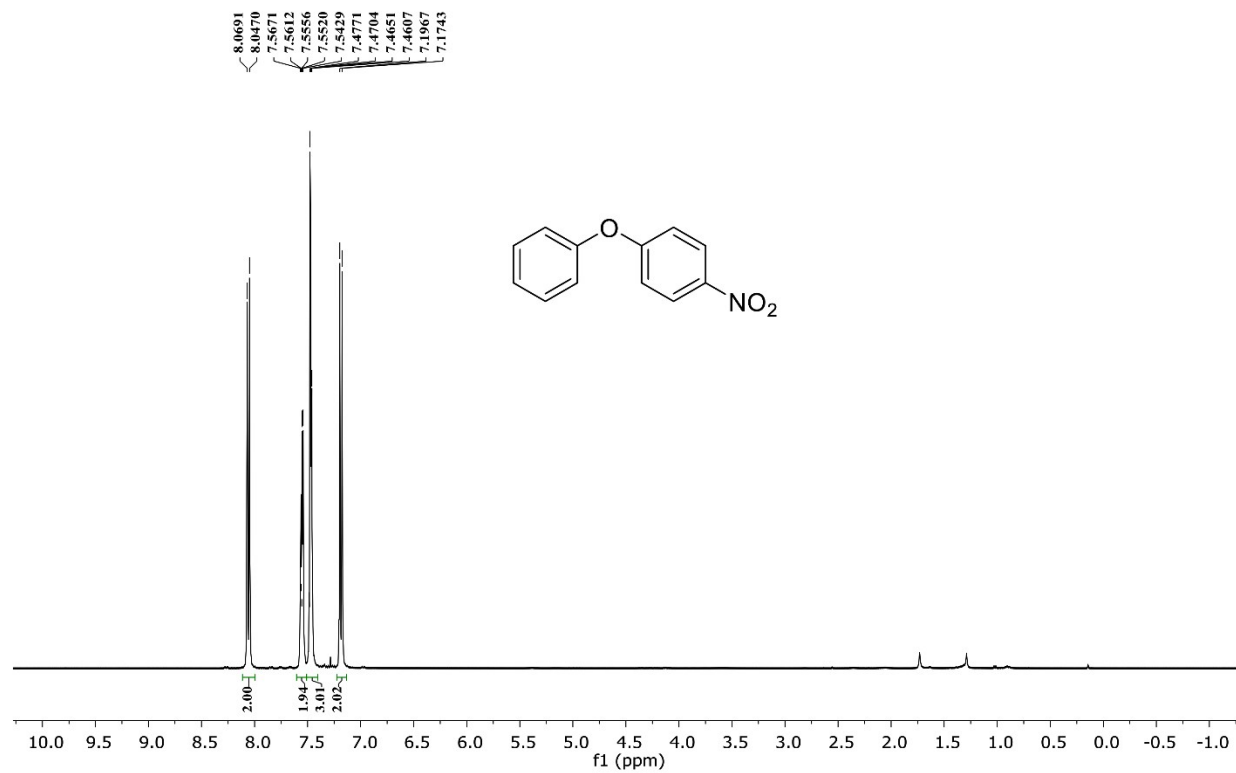

Figure S7. <sup>1</sup>H NMR spectrum of 1-Nitro-4-phenoxybenzene.



## Supporting Information

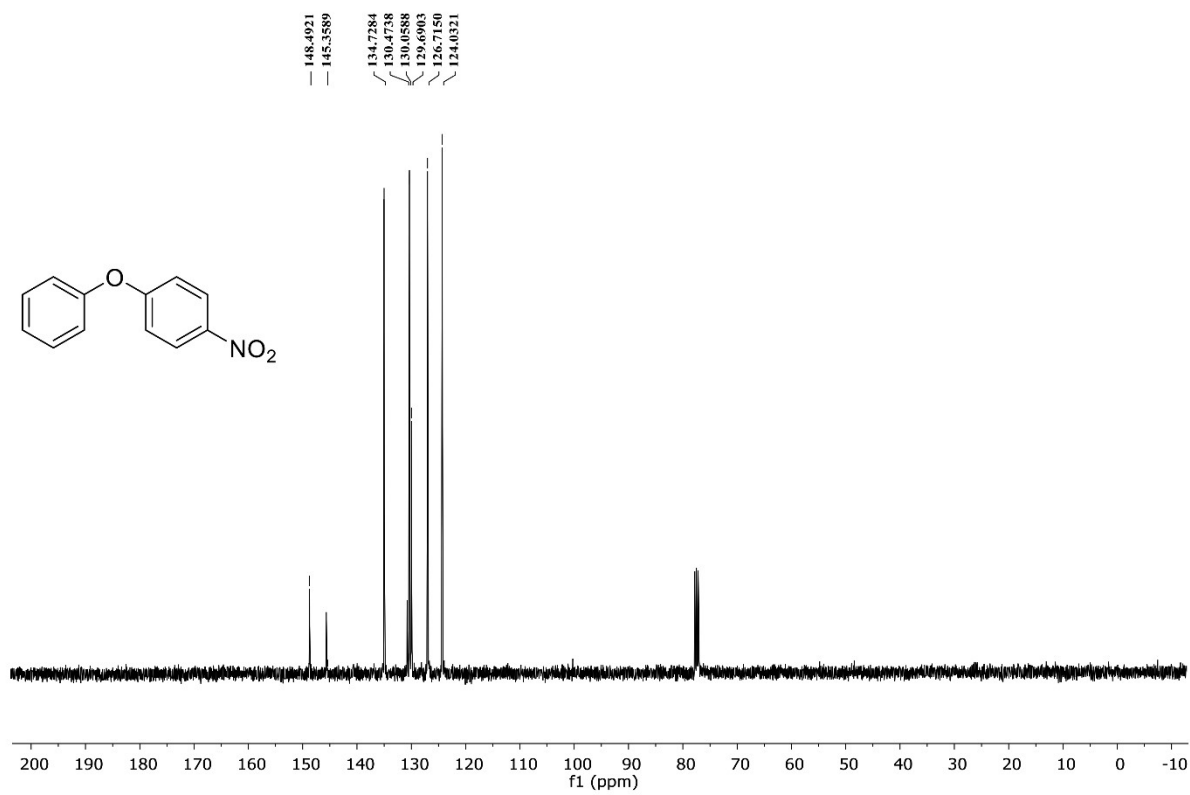

**Figure S8.** <sup>13</sup>CNMR spectrum of 1-Nitro-4-phenoxybenzene.
